# Supplementary material for: Microstructural study of different thick dimethacrylate-based samples using different amounts of photoinitiator
Source: Royal Society of Chemistry journal article supplement (doi:10.1039/d3py00297g), 2023-01-01
Supplement: d3py00297g1.pdf [file d3py00297g1.pdf]

## Supporting information

### Microstructural study of different thick dimetacrylate-based samples using different amount of photoinitiator

Katarína Cifraničová,<sup>\*a</sup> Ondrej Šauša,<sup>a,b</sup> David Pavel Královič,<sup>a</sup> Helena Švajdlenková<sup>\*a,c</sup>

<sup>a</sup>Department of Nuclear Chemistry, Faculty of Natural Science, Comenius University in Bratislava, Ilkovičova 6, 842 15 Bratislava, Slovak Republic

<sup>b</sup>Institute of Physics, Slovak Academy of Sciences, Dúbravská cesta 9, 845 11 Bratislava, Slovak republic

<sup>c</sup>Polymers Institute, Slovak Academy of Sciences, Dúbravská cesta 9, 845 41 Bratislava, Slovak republic

Correspondence to: Katarína Cifraničová (E-mail: [katarina.cifranicova@uniba.sk](mailto:katarina.cifranicova@uniba.sk)), Helena Švajdlenková (E-mail: [helena.svajdlenkova@savba.sk](mailto:helena.svajdlenkova@savba.sk))

#### 1. The time dependence of the local free volume of samples described by the Boltzmann function.

Figs. S1 – S2 display the time dependence of the local free volume size  $V_h$  for two different thick 2M samples with two different contents of PI. The experimental time dependence of the local free volume changes ( $V_h$ ) during photopolymerization was fitted by the Boltzmann sigmoid function given as

$$V_h(t) = V_{h,2} + \frac{V_{h,1} - V_{h,2}}{1 + e^{[(t - t_{ip})/dt]}}$$

(1)

where  $t$  and  $dt$  is the reaction time and the time constant, respectively.  $V_{h,1}$  and  $V_{h,2}$  are the initial liquid and final cured state of the local free volume, respectively and  $t_{ip}$  is a center of sigmoid or the time which corresponds to inflection point of sigmoidal curve. Fitting the time evolution of the local free volume sizes ( $V_h$ ) with eq. 1 provides following important parameters: the time of reaction at the inflex point ( $t_{ip}$ ) which corresponds to  $V_{h,ip}$  and the maximum of 1<sup>st</sup> derivation ( $R_{max}$ ). The inflection point also indicates the time when the reaction has the fastest progress. Other important parameter is the full width at half of maximum (FWHM) of 1<sup>st</sup> derivative curve of sigmoid function which characterizes the time region of obvious local free-volume

changes in the sample. The main time region of obvious local free-volume changes, characterized by FWHM, reflects a continuous change of microstructure during crosslinking. Finally,  $V_{h,2}$  parameter corresponds to the local free-volume size of the final cured sample. The 2M samples with 0.5mol% of PI exhibit more reduced  $V_{h,2}$  compared to the 2M samples with 0.1mol % of PI (Figs. S1-S2).

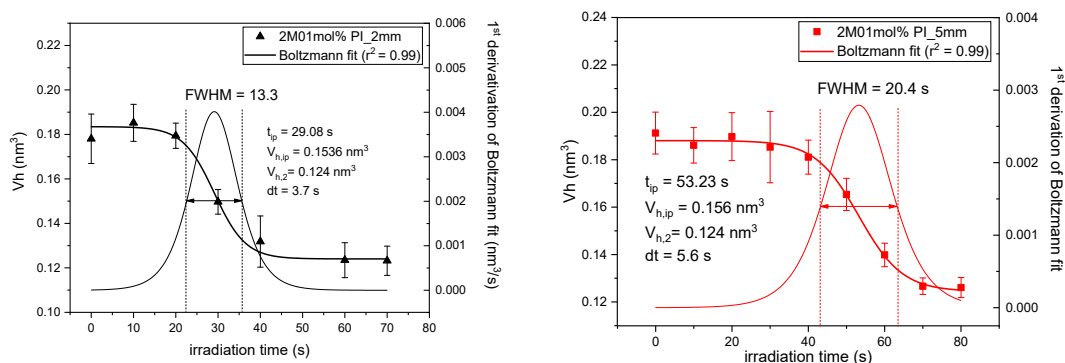

**Fig.S1** The time dependence of the local free volume  $V_h$  for the 2 mm and 5 mm thick 2M sample with 0.1mol % of PI described by the Boltzmann function and its first derivation.

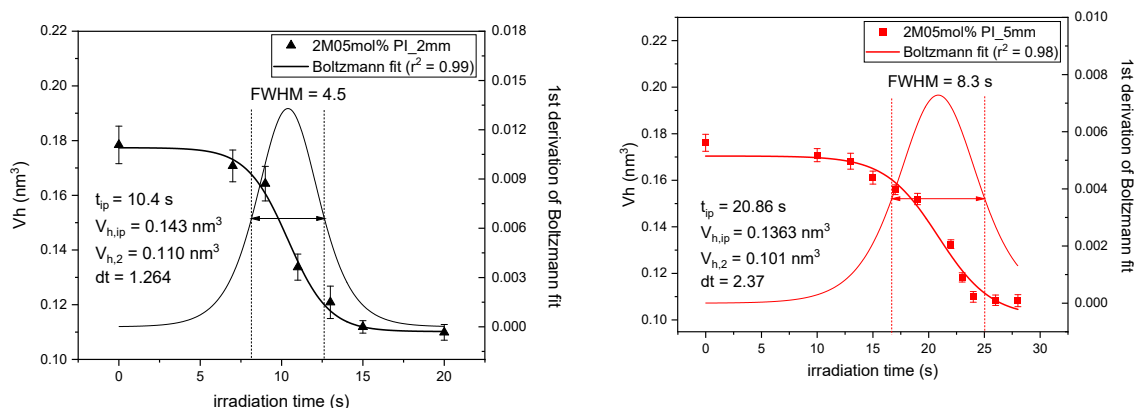

**Fig.S2** The time dependence of the local free volume  $V_h$  for the 2 mm and 5 mm thick 2M sample with 0.5mol % of PI described by the Boltzmann function and its first derivation.

## 2. NIR – regions of double bonds and the 1<sup>st</sup> overtone of NH groups

Figure S3 shows the absorption band of double bonds (6172.3 cm<sup>-1</sup>) and the region of NH groups (6500.21 – 6901.24 cm<sup>-1</sup>) selected at the fitting procedure for a serie of the cured 2M samples.

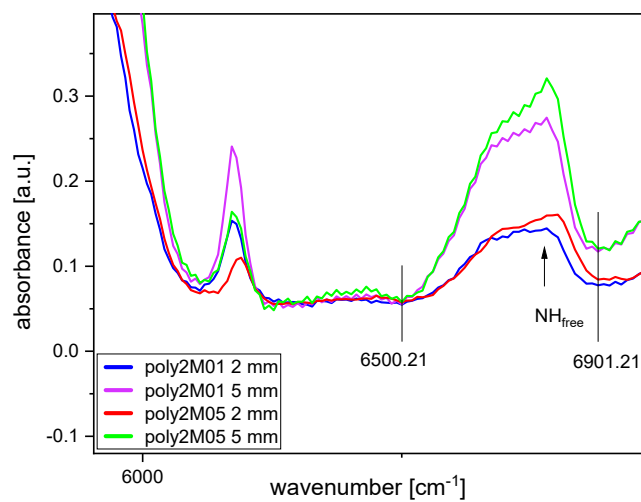

**Fig. S3** The absorption regions of double bonds and 1<sup>st</sup> overtone of NH groups for the cured 2 mm and 5 mm thick poly2M samples with 0.1 and 0.5 mol% of PI.
